# Supplementary material
Source: PubMed Central journal article supplement (PMC3486228)
Supplement: JCM.01175-12_zjm999092019so1.pdf [file JCM.01175-12_zjm999092019so1.pdf]

SUPPLEMENTARY TABLE 1. Minimum inhibitory concentration breakpoints of *Mycobacterium abscessus* and *M. massiliense* isolates to different antimicrobials

| Drug                      | Species               | No. of strains distributed at MIC (µg/mL) |      |       |      |     |    |    |    |    |    |     |     |     |     |     |       |
|---------------------------|-----------------------|-------------------------------------------|------|-------|------|-----|----|----|----|----|----|-----|-----|-----|-----|-----|-------|
|                           |                       | 0.03                                      | 0.06 | 0.125 | 0.25 | 0.5 | 1  | 2  | 4  | 8  | 16 | 32  | 64  | 128 | 256 | 512 | 1,024 |
| Clarithromycin            | <i>M. abscessus</i>   | 1                                         | 1    | 2     | 2    | 10  | 13 | 17 | 7  | 3  | 2  | 2   | 3   |     |     |     |       |
|                           | <i>M. massiliense</i> | 1                                         | 2    | 3     | 5    | 3   | 5  | 2  | 1  |    |    |     | 1   |     |     |     |       |
| Kanamycin <sup>†</sup>    | <i>M. abscessus</i>   |                                           |      | 1     |      |     | 7  | 30 | 12 | 7  | 3  |     | 3   |     |     |     |       |
|                           | <i>M. massiliense</i> |                                           |      |       |      |     | 2  | 11 | 6  | 3  | 1  |     |     |     |     |     |       |
| Amikacin                  | <i>M. abscessus</i>   |                                           |      |       |      |     | 4  | 20 | 14 | 11 | 7  | 3   | 4   |     |     |     |       |
|                           | <i>M. massiliense</i> |                                           |      |       |      |     | 1  | 6  | 6  | 8  | 1  | 1   |     |     |     |     |       |
| Imipenem                  | <i>M. abscessus</i>   |                                           |      |       |      |     |    | 3  | 8  | 16 | 24 | 7   | 5   |     |     |     |       |
|                           | <i>M. massiliense</i> |                                           |      |       |      |     |    |    | 1  | 5  | 6  | 9   | 2   |     |     |     |       |
| Moxifloxacin              | <i>M. abscessus</i>   |                                           |      | 1     | 1    |     | 2  | 1  | 1  | 5  | 1  | 20  | 31* |     |     |     |       |
|                           | <i>M. massiliense</i> |                                           |      |       |      |     |    | 1  | 1  |    | 1  | 11  | 9*  |     |     |     |       |
| Ciprofloxacin             | <i>M. abscessus</i>   |                                           |      |       |      |     |    | 3  | 3  | 4  | 4  | 34  | 15* |     |     |     |       |
|                           | <i>M. massiliense</i> |                                           |      |       |      |     | 1  | 1  |    | 1  |    | 11  | 9*  |     |     |     |       |
| Isoniazid <sup>‡</sup>    | <i>M. abscessus</i>   |                                           |      |       |      |     |    |    |    |    |    |     |     |     |     |     | 63*   |
|                           | <i>M. massiliense</i> |                                           |      |       |      |     |    |    |    |    |    |     |     |     |     |     | 23*   |
| Rifampicin <sup>†</sup>   | <i>M. abscessus</i>   |                                           |      |       |      |     | 1  | 1  |    |    |    | 61* |     |     |     |     |       |
|                           | <i>M. massiliense</i> |                                           |      |       |      |     |    |    |    |    |    |     | 23* |     |     |     |       |
| Ethambutol <sup>‡</sup>   | <i>M. abscessus</i>   |                                           |      |       |      |     |    |    |    |    |    | 1   |     |     | 13  | 49* |       |
|                           | <i>M. massiliense</i> |                                           |      |       |      |     |    |    |    |    |    |     |     |     | 6   | 17* |       |
| Streptomycin <sup>†</sup> | <i>M. abscessus</i>   |                                           |      |       |      |     |    | 2  |    | 2  | 6  | 11  | 13  | 11  | 9   | 6   | 3     |
|                           | <i>M. massiliense</i> |                                           |      |       |      |     |    |    |    | 3  | 3  | 3   | 5   | 1   | 6   | 1   | 1     |

Abbreviations: MIC = minimum inhibitory concentration; NA = not available

Drug susceptibility results are shown for 63 patients with *M. abscessus* and 23 patients with *M. massiliense* infection.

Italic entries and boldface entries indicate the susceptible and resistant categories, respectively, of interpretive criteria for each antimicrobial agent.

\* High off-scale MICs were converted to the next highest concentration.

† The CLSI breakpoints (M100-S21) for *Staphylococcus* species have been substituted as the breakpoint of these drugs against *M. abscessus* and *M. massiliense* isolates.

‡ The breakpoints for *M. abscessus* and *M. massiliense* isolates have not yet been established.
